# Supplementary material
Source: PubMed Central journal article supplement (PMC5826101)
Supplement: AAC.01966-17_zac003186952s1.pdf [file AAC.01966-17_zac003186952s1.pdf]

## **Supplementary material**

### **Crystal Structure of NisI in a Lipid Free Form, the Nisin Immunity Protein, from *Lactococcus lactis***

Jin Hee Jeong<sup>1</sup> and Sung Chul Ha<sup>1\*</sup>

<sup>1</sup>Beamline Department, Pohang Accelerator Laboratory, Pohang University of Science and  
Technology, Pohang, Gyeongbuk 37673, Republic of Korea

\*Address correspondence to Sung Chul Ha, [scha2@postech.ac.kr](mailto:scha2@postech.ac.kr)

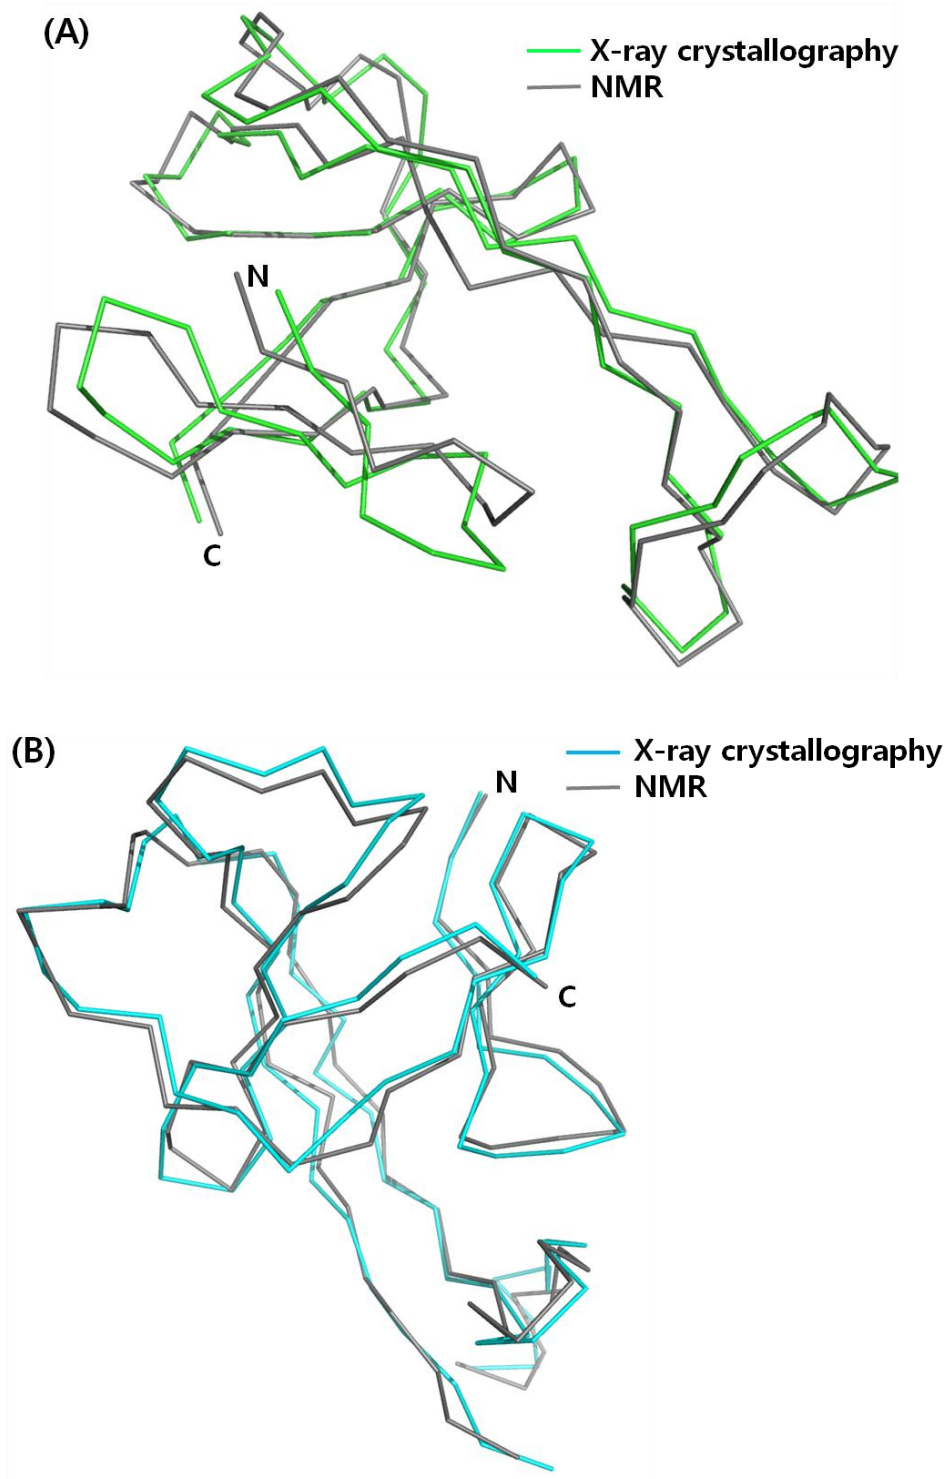

**Fig S1** Structural superposition of the  $\beta$ -barrels of the N- (A) and C-terminal domains (B) determined by X-ray crystallography or NMR. The orientation of each domain is similar to that of Figure 2A.

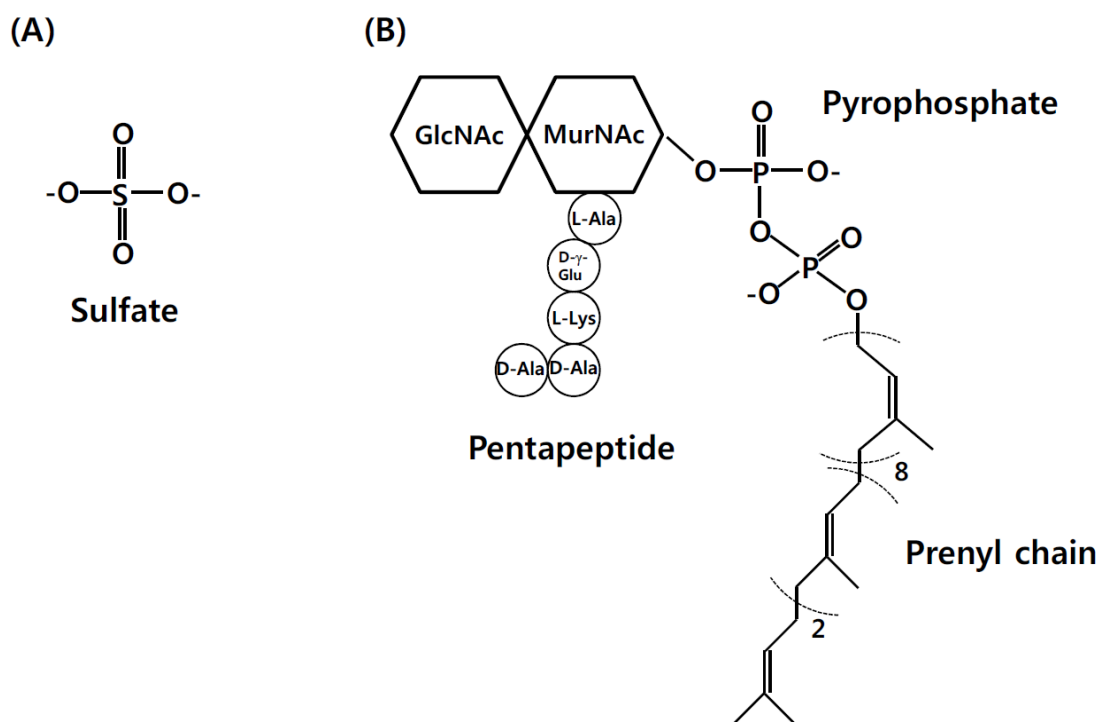

**Fig S2** Structural resemblance of a sulfate ion with a phosphate of pyrophosphate group comprising lipid II. (A) Chemical structure of a sulfate ion and (B) lipid II with a prenyl chain made up of 11 isoprene repeats. Sugars and amino acids are shown schematically. Natural full-length lipid II contains a prenyl chain made up of 11 isoprene repeats. GlcNAc, N-acetylglucosamine; MurNAc, N-acetylmuramic acid.
